# Supplementary material for: Elucidation of physico-chemical principles of high-density lipoprotein–small RNA binding interactions
Source: PubMed Central journal article supplement (PMC9133651; doi:10.1016/j.jbc.2022.101952), 2022-04-18
Supplement: mmc1.pdf [file mmc1.pdf]

## SUPPORTING INFORMATION

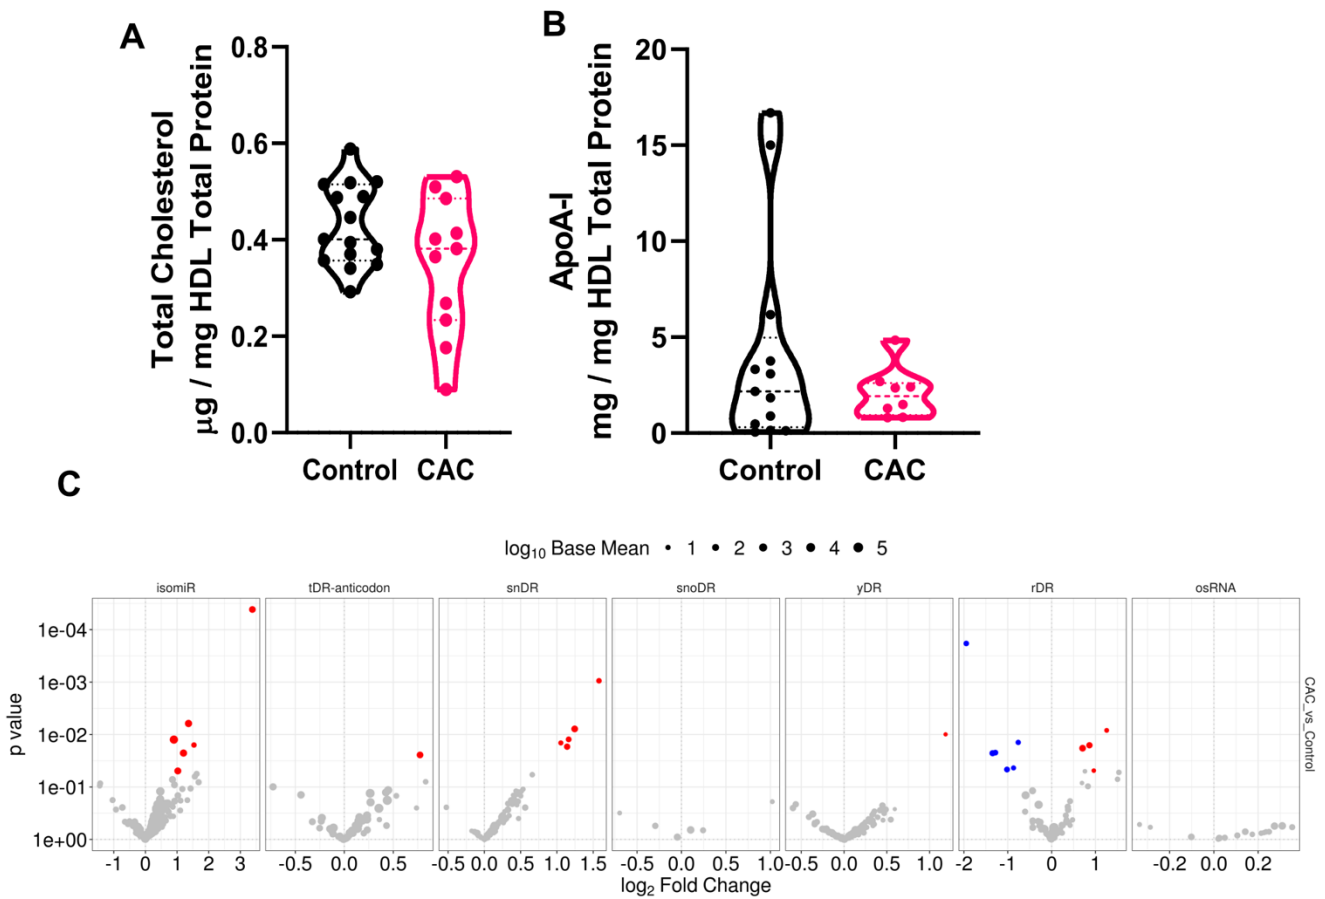

**Figure S1.** HDL isolated by density-gradient ultracentrifugation (DGUC) was assayed for **A**) total cholesterol and protein by colorimetric kit and **B**) ApoA-I protein by ELISA (n=11 Control, n=11 CAC subjects). Violin plots showing median and quartile ranges. **C**) Differential expression analysis at the parent level from sRNA sequencing of HDL from Control (n=46) and CAC (n=21) Subjects. Volcano plots demonstrating significant DESeq2 analysis and the log<sub>2</sub> fold change. Red, increased; blue, decreased.

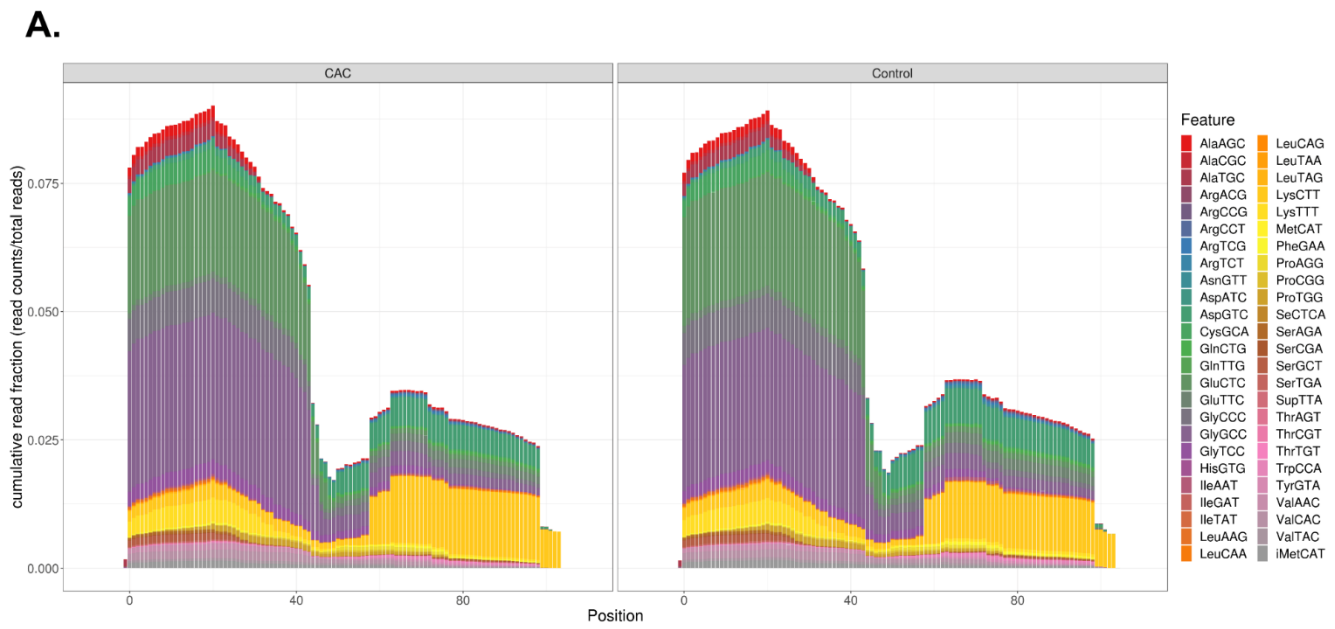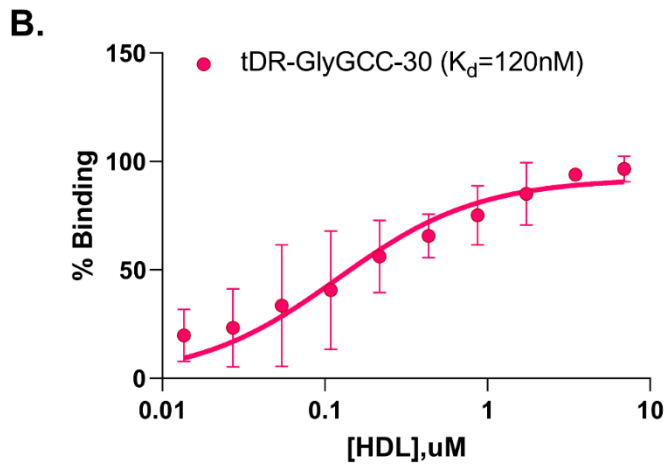

**Figure S2. A)** Positional coverage of maps of HDL tDRs for parent tRNA amino acid anti-codons, reported as mean cumulative read fraction (read counts/total counts) between Control (n=46) and CAC (n=21) subjects. **B)** Fluorescence electrophoretic mobility shift assay nonlinear regression binding percentage of DGUC-HDL complexed with tDR-GlyGCC-30 labelled with Alexa Fluor 546. Binding affinity ( $K_d$ ) is shown. n=3, data are mean  $\pm$  SD.

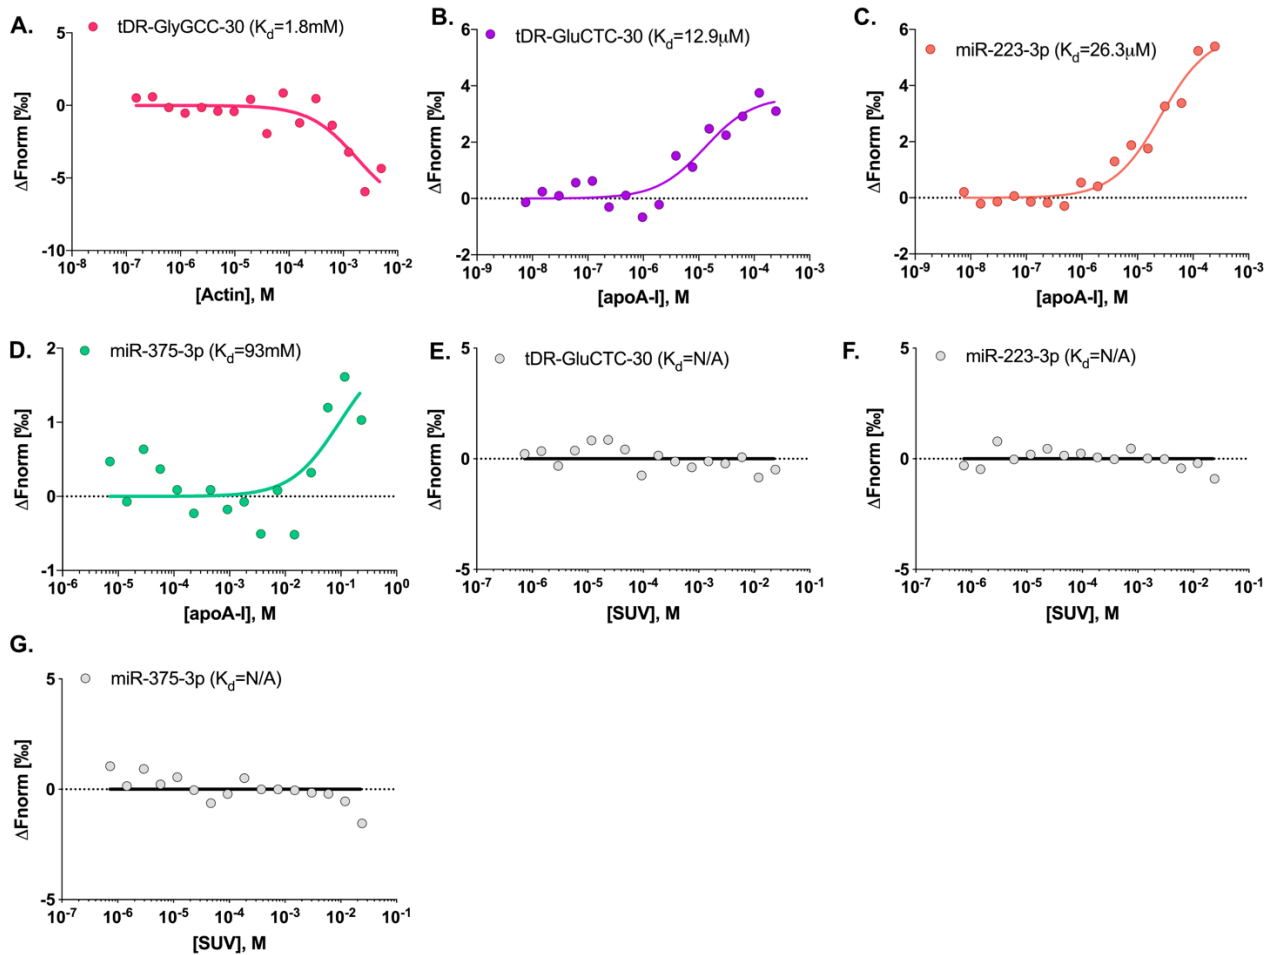

**Figure S3.** MST analysis of interactions between **A)** tDR-GlyGCC-30 and actin (rabbit muscle, Sigma), apoA-I and **B)** tDR-GluCTC-30, **C)** miR-223-3p, and **D)** miR-375-3p; and single unilamellar vesicles (SUV) and **E)** tDR-GluCTC-30, **F)** miR-223-3p, **G)** miR-375-3p. Binding affinities ( $K_d$ ) of representative curves are shown.

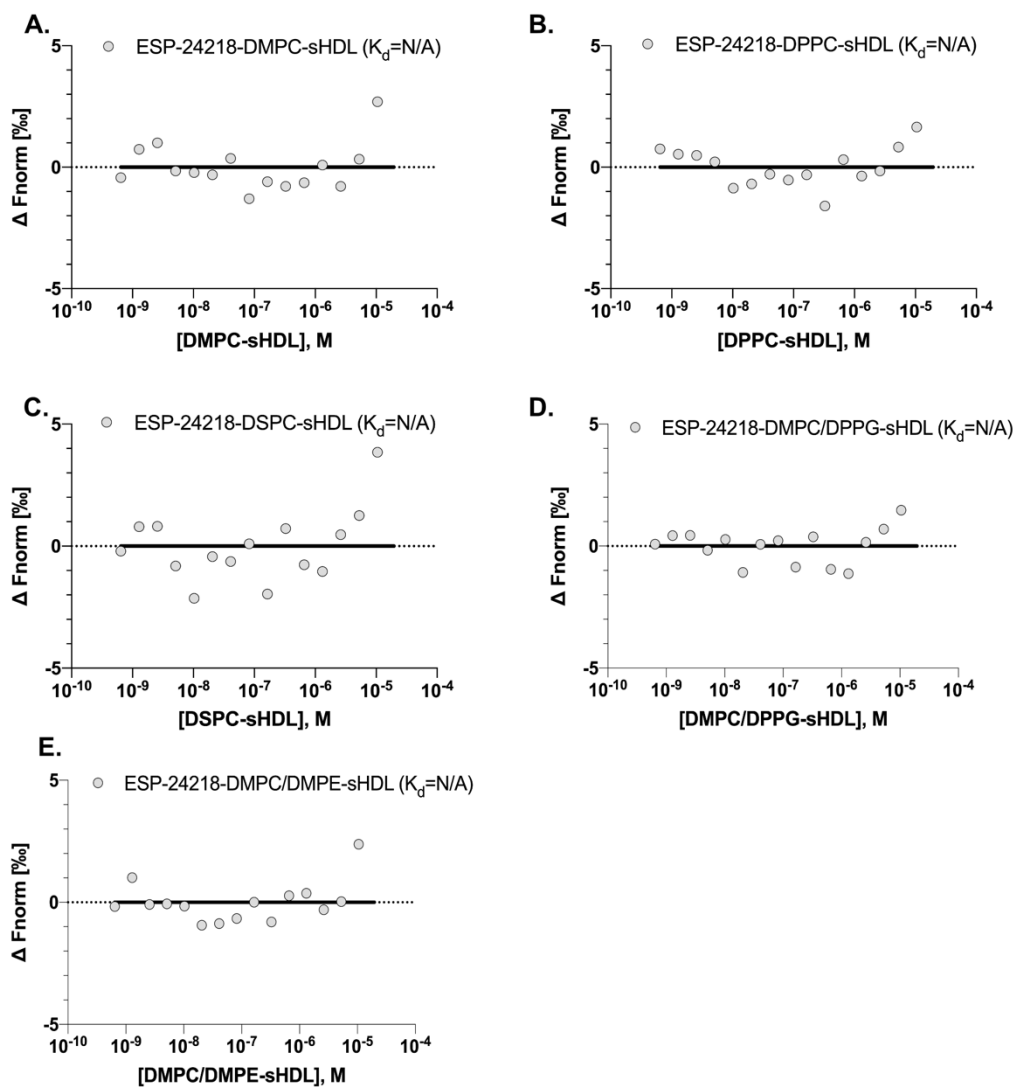

**Figure S4.** MST analysis of interactions between tDR-GlyGCC-30 and synthetic HDL (sHDL) with apoA-I mimetic peptide, ESP-24218, and either **A**) 1,2-dimyristoyl-sn-glycero-3-phosphocholine (DMPC), **B**) 1,2-dipalmitoyl-sn-glycero-3-phosphocholine (DPPC), **C**) 1,2-distearoyl-sn-glycero-3-phosphocholine (DSPC), **D**) DMPC and 1,2-dipalmitoyl-sn-glycero-3-phosphorylglycerol (DPPG), and **E**) DMPC and 1,2-Dimyristoyl-sn-glycero-3-phosphoethanolamine (DMPE). Representative curves and binding affinities ( $K_d$ ) are shown.

**Table S1: Clinical parameters for CAC and Control Subjects**

|                                        | <b>CAC (N=21)</b> | <b>Control (N=46)</b> | <b>P-value</b> |
|----------------------------------------|-------------------|-----------------------|----------------|
| Age, years                             | 61 (54, 67)       | 45 (37, 56)           | <0.001         |
| Race, # (% Caucasian)                  | 18 (86)           | 39 (85)               | 0.92           |
| Sex, # (% female)                      | 9 (43)            | 30 (65)               | 0.09           |
| Total-C, mg/dL                         | 218 (185, 326)    | 191 (176, 267)        | 0.14           |
| HDL-C, mg/dL                           | 53 (49, 74)       | 57 (51, 67)           | 0.91           |
| LDL-C, mg/dL                           | 142 (110, 221)    | 118 (96, 182)         | 0.23           |
| Triglycerides, mg/dL                   | 103 (73, 171)     | 90 (76, 117)          | 0.35           |
| Coronary calcium score, Agatston units | 61 (9, 221)       | 0 (0, 0)              | <0.001         |

Race, Sex, P value Pearson Chi-Square; P value Mann-Whitney U; Median (25% and 75% quartiles)

**Table S2. HDL-tDR changes associated with atherosclerosis, as reported by parent tRNA summary counts.**

| <b>tRNA</b> | <b>pvalue</b> | <b>FoldChange (CAC/Ctr)</b> | <b>Abundance (baseMean)</b> |
|-------------|---------------|-----------------------------|-----------------------------|
| ThrCGT      | 2.45E-02      | 1.71                        | 66.46                       |
| MetCAT      | 9.94E-02      | 0.60                        | 190.22                      |
| GlyTCC      | 1.15E-01      | 1.36                        | 1607.17                     |
| ValAAC      | 1.27E-01      | 1.34                        | 660.84                      |
| LysCTT      | 1.32E-01      | 1.20                        | 7326.00                     |
| AsnGTT      | 1.41E-01      | 0.74                        | 312.79                      |
| IleGAT      | 1.48E-01      | 1.45                        | 18.80                       |
| GlyGCC      | 1.80E-01      | 1.36                        | 16333.19                    |
| AlaTGC      | 1.96E-01      | 1.20                        | 1482.58                     |
| SerACT      | 2.48E-01      | 1.27                        | 11.38                       |
| TyrATA      | 2.51E-01      | 1.67                        | 9.80                        |

**Table S3. Significantly altered host HDL-tDRs in human atherosclerosis (read level).**

| <b>tDR</b>                         | <b>Length</b> | <b>P-value</b> | <b>FoldChange (CAC/Ctr)</b> | <b>Abundance (baseMean)</b> | <b>Parent tRNA</b> |
|------------------------------------|---------------|----------------|-----------------------------|-----------------------------|--------------------|
| TCGTGGGTTTCGAGCCCCACGTTGGGCG       | 27            | 1.30E-04       | 6.58                        | 373.86                      | tRNA-LysCTT        |
| GCATTGGTGGTTTCAGTGGTAGAATTCTCGC    | 30            | 1.21E-03       | 3.50                        | 531.33                      | tRNA-GlyGCC        |
| GCATTGGTGGTTTCAGTGGTAGAATTCTCGCCTG | 33            | 3.72E-03       | 2.47                        | 1376.64                     | tRNA-GlyGCC        |
| TCGTTTCCCGGCCAACGCA                | 19            | 4.04E-03       | 0.17                        | 19.71                       | tRNA-GlyTCC        |
| GCATCGGTGGTTTCAGTGGTAGAATTCTCGCCT  | 32            | 6.31E-03       | 2.92                        | 15.56                       | tRNA-GlyGCC        |
| TCCCTGGTGGTCTAGTGGTTAGGATTTCG      | 28            | 1.52E-02       | 2.91                        | 162.85                      | tRNA-GluCTC        |
| AATCTCAAGGTTGCGG                   | 16            | 2.15E-02       | 0.27                        | 8.02                        | tRNA-IleAAT        |
| TCCCTGGTGGTCTAGTGGTTAGGATTTCGCGG   | 31            | 2.18E-02       | 2.01                        | 655.25                      | tRNA-GluCTC        |
| GCGGGTGTAGCTCAGT                   | 16            | 3.75E-02       | 0.47                        | 47.75                       | tRNA-CysGCA        |
| GCGGGTGTAGCTCAGTGGTA               | 20            | 4.22E-02       | 2.23                        | 37.58                       | tRNA-CysGCA        |
| GGGGTGTAGCTCAAT                    | 16            | 4.61E-02       | 1.95                        | 42.82                       | tRNA-CysGCA        |
| CGATTCCCGGGCGCGCA                  | 18            | 4.86E-02       | 3.31                        | 14.52                       | tRNA-GlyCCC        |

**Table S4. Significantly altered host HDL-miRNAs in human atherosclerosis (read level).**

| miRNA read              | Length | P-value  | FoldChange (CAC/Ctr) | Abundance (baseMean) | miRNA            |
|-------------------------|--------|----------|----------------------|----------------------|------------------|
| ACCTGTAGATCCGAATTTGT    | 21     | 3.88E-03 | 4.58                 | 78.41                | hsa-miR-10a-5p   |
| TGAGATGAAGCACTGTAGCTCA  | 22     | 3.96E-03 | 0.13                 | 16.60                | hsa-miR-143-3p   |
| TGTTGTACTTTTTTTTTTGT    | 20     | 5.33E-03 | 6.65                 | 12.89                | hsa-miR-3613-5p  |
| AATAATACATGGTTGATCTTT   | 21     | 9.13E-03 | 5.23                 | 19.43                | hsa-miR-369-3p   |
| TGTCCACCCCACTCCTGTTT    | 22     | 2.11E-02 | 0.26                 | 28.42                | hsa-miR-4433b-5p |
| AAACCGTTACCACTACTGAGT   | 21     | 2.82E-02 | 1.81                 | 612.60               | hsa-miR-451a     |
| TGAGGTAGTAGGTTGTGT      | 18     | 3.21E-02 | 1.85                 | 98.80                | hsa-let-7b-5p    |
| CTGGCCCTCTGCCCTCCGT     | 22     | 3.36E-02 | 0.27                 | 19.56                | hsa-miR-328-3p   |
| AAACCGTTACCACTACTGAGTT  | 22     | 3.37E-02 | 1.91                 | 375.74               | hsa-miR-451a     |
| AAACCGTTACCACTACTGAGTTT | 23     | 3.89E-02 | 2.50                 | 87.89                | hsa-miR-451a     |
| TATTGCACTTGCCCGCCTG     | 21     | 4.57E-02 | 1.62                 | 228.56               | hsa-miR-92a-3p   |

**Table S5. Significantly altered host HDL-rDRs in human atherosclerosis (read level).**

| rDR read                                | Length | P-value  | FoldChange (CAC/Ctr) | Abundance (baseMean) | Parent rRNA   |
|-----------------------------------------|--------|----------|----------------------|----------------------|---------------|
| TCCCTGCCCTTTGTACACACCGCCGTCGCTACTACCGAT | 40     | 6.19E-06 | 0.04                 | 32.52                | rRNADB_18S_gi |
| GGAACGTGAGCTGGGTTTAGACCGTCGTGAGA        | 32     | 8.97E-05 | 0.05                 | 31.32                | rRNADB_28S_gi |
| TCCCTGCCCTTTGTACACACCGCCGTCGCTACT       | 34     | 1.00E-03 | 0.15                 | 29.40                | rRNADB_18S_gi |
| TTCCGGAGAGGGAGCCTGAGAAACG               | 25     | 3.49E-03 | 0.12                 | 25.42                | rRNADB_18S_gi |
| AAAGAAGACCCTGTTGAGCTTG                  | 22     | 3.64E-03 | 1.92                 | 167.86               | rRNADB_28S_gi |
| ACCACATCCAAGGAAGGCAGCAGGCCG             | 27     | 3.94E-03 | 7.26                 | 25.14                | rRNADB_18S_gi |
| GGTAAACGGCGGGAGTAACATGACTCT             | 28     | 4.05E-03 | 4.92                 | 26.01                | rRNADB_28S_gi |
| GGTAGCCAAATGCCTCGTCATCT                 | 23     | 5.62E-03 | 0.24                 | 45.20                | rRNADB_28S_gi |
| CCCTGTTGAGCTTGACTCTAGTCT                | 24     | 9.17E-03 | 0.17                 | 19.03                | rRNADB_28S_gi |
| ACTAATAGGGAACGTGAGCTG                   | 21     | 1.57E-02 | 2.66                 | 36.10                | rRNADB_28S_gi |
| GGGTTTCGATTCGGAGAGGGAGCCTGAGAAA         | 31     | 1.59E-02 | 7.82                 | 16.59                | rRNADB_18S_gi |
| GATTCTGCCAGTCTCTGAA                     | 22     | 0.01684  | 2.03                 | 93.74                | rRNADB_28S_gi |
| CTTGTACACACCGCCGTCGC                    | 22     | 0.01891  | 0.23                 | 13.70                | rRNADB_18S_gi |
| AAGACCCTGTTGAGCTTGACTTAGT               | 26     | 0.02307  | 1.98                 | 126.15               | rRNADB_28S_gi |
| TATAGACAGCAGGACGGTGCCCA                 | 23     | 0.02348  | 0.28                 | 56.03                | rRNADB_28S_gi |
| GGGAACGTGAGCTGGGTTTAGACCGTCGTGAGACAGG   | 37     | 0.02477  | 0.23                 | 31.68                | rRNADB_28S_gi |
| ATCCTTCGATGTCGGCTCTTCCT                 | 23     | 0.02517  | 1.29                 | 576.43               | rRNADB_28S_gi |
| AATCAGCGGGGAAGAAGAC                     | 20     | 0.02536  | 4.68                 | 8.71                 | rRNADB_28S_gi |
| GTGATTCTGCCAGTCTGCTG                    | 22     | 0.02941  | 4.11                 | 15.99                | rRNADB_28S_gi |
| CTTGTACACACCGCCGTC                      | 20     | 0.03058  | 2.54                 | 16.77                | rRNADB_18S_gi |
| ACTGGGTGCTGTACGCTT                      | 18     | 0.03179  | 4.86                 | 10.83                | RNA5SP103     |
| GTAGCTGGTTCCTCCGAAGT                    | 21     | 0.0325   | 3.84                 | 17.02                | rRNADB_28S_gi |
| ACGTGAGCTGGGTTTAGACCGTCGTGAGACAGGTTAG   | 37     | 0.03341  | 0.31                 | 55.80                | rRNADB_28S_gi |
| ATTGGAGGGCAAGTCTGGTGCCA                 | 23     | 0.0354   | 2.15                 | 68.20                | rRNADB_18S_gi |
| AACGGCGGGAGTAACATGACTCTCTTAAGGTAGCC     | 36     | 0.03595  | 3.83                 | 31.58                | rRNADB_28S_gi |
| CGTGAGCTGGGTTTAGACCGT                   | 21     | 0.0369   | 0.40                 | 31.25                | rRNADB_28S_gi |
| AAGACCCTGTTGAGCTTGACT                   | 21     | 0.03758  | 2.01                 | 73.48                | rRNADB_28S_gi |
| AGCGCGGGTAAACGGCGGGAGTAACAT             | 28     | 0.03816  | 3.71                 | 32.43                | rRNADB_28S_gi |
| TGTGATTCTGCCAGTCTCTGAATG                | 27     | 0.03896  | 2.02                 | 134.47               | rRNADB_28S_gi |
| TTGATGTCGGCTCTTCTATCATT                 | 25     | 0.03899  | 2.83                 | 37.15                | rRNADB_28S_gi |
| AGGTAGCCAAATGCCTCGTCA                   | 21     | 0.04152  | 4.53                 | 12.01                | rRNADB_28S_gi |
| CAATAACAGGTCTGTGATGCCC                  | 22     | 0.04237  | 2.74                 | 20.41                | rRNADB_18S_gi |
| CGCGGGTAAACGGCGGGAGTAAC                 | 23     | 0.04237  | 0.29                 | 22.42                | rRNADB_28S_gi |
| ACGTGAGCTGGGTTTAGACCG                   | 21     | 0.04467  | 0.52                 | 58.09                | rRNADB_28S_gi |
| CTTAAAGGAATTGACGGAAGGGACCACCAG          | 31     | 0.0469   | 0.33                 | 44.08                | rRNADB_18S_gi |
| GTAACGGCGGGAGTAACATGACTCTCT             | 29     | 0.04757  | 2.18                 | 64.72                | rRNADB_28S_gi |
| AACGGCGGGAGTAACATGACTCTCTAAGG           | 31     | 0.04958  | 3.56                 | 22.49                | rRNADB_28S_gi |

**Table S7. Sequences of synthesized oligonucleotides used in the study.**

| Name                                                                       | Assay         | Sequence (5'-3')                                                                                                                                  | Company |
|----------------------------------------------------------------------------|---------------|---------------------------------------------------------------------------------------------------------------------------------------------------|---------|
| tDR-GlyGCC-30; ssRNA-tDR-GlyGCC-30; tDR-GlyGCC-5'-tRH-30; PO-tDR-GlyGCC-30 | MST           | rGrCrA rUrUrG rGrUrG rGrUrU rCrArG rUrGrG rUrArG rArArU rUrCrU rCrGrC /3AlexF647N/                                                                | IDT     |
| tDR-GlyGCC-5'T                                                             | MST           | rGrCrA TTrG rGTTrG rGrUrU rCrArG rUrGrG rUrArG rArArU rUrCrU rCrGrC /3AlexF647N/                                                                  | IDT     |
| tDR-GlyGCC-5'midT                                                          | MST           | rGrCrA TTrG rGTTrG rGTT rCrArG TrGrG TrArG rArArU rUrCrU rCrGrC /3AlexF647N/                                                                      | IDT     |
| tDR-GlyGCC-5'mid3'T                                                        | MST           | rGrCrA TTrG rGTTrGrGTT rCrArG TrGrG TrArG rArAT TrCT rCrGrC /3AlexF647N/                                                                          | IDT     |
| dsRNA-tDR-GlyGCC                                                           | MST           | Sense:rGrCrArUrUrGrUrGrUrUrUrCrArGrUrGrUrArGrArArUrUrCrUrCrGrC/3AlexF647N/;<br>Antisense:rGrCrGrArGrArArUrUrCrUrArCrCrArCrUrGrArArCrCrArCrArUrGrC | IDT     |
| 2'-O'Me-tDR-GlyGCC                                                         | MST           | rGrCrA mUmUrG rGmUrG rGmUmUrCrArG mUrGrG mUrArG rArAmU mUrCmU rCrGrC /3AlexF647N/                                                                 | IDT     |
| tDR-GlyGCC-DNA                                                             | MST           | GCA TTG GTG GTT CAG TGG TAG AAT TCT CGC /3AlexF647N/                                                                                              | IDT     |
| tDR-GlyGCC-LNA                                                             | MST           | rGrC+A* rUrU+G* rGrU+G* rGrUrU+C*rA+G* rUrG+G* rUrArG +A*rArU rU+C*rU rCrGrC /3AlexF647N/                                                         | IDT     |
| tDR-GlyCC-5'tRF                                                            | MST           | rGrCrA rUrUrG rGrUrG rGrUrU rCrArG /3AlexF647N/                                                                                                   | IDT     |
| tDR-GlyGCC-3'tRF                                                           | MST           | rUrGrG rUrArG rArArU rUrCrU rCrGrC /3AlexF647N/                                                                                                   | IDT     |
| 3'tRH-GlyGCC                                                               | MST           | rCrUrG rCrCrA rCrGrC rGrGrG rArGrG rCrCrC rGrGrG rUrUrC rGrArU rUrCrC /3AlexF647N/                                                                | IDT     |
| tDR-GlyCCC-30                                                              | MST           | rGrCrG rCrCrG rCrUrG rGrUrG rUrArG rUrGrG rUrArU rCrArU rGrCrA rArGrA /3AlexF647N/                                                                | IDT     |
| tDR-LysCTT-30                                                              | MST           | rCrCrG rGrCrU rArGrC rUrCrA rGrUrC rGrUrU rArGrA rGrCrA rUrGrA rGrArC /3AlexF647N/                                                                | IDT     |
| tRH-GlyGCC-PS                                                              | MST           | rG*rC*rA* rU*rU*rG* rG*rU*rG* rG*rU*rU*rC*rA*rG* rU*rG*rG* rU*rA*rG* rA*rA*rU* rU*rC*rU* rC*rG*rC* /3AlexF647N/                                   | IDT     |
| tDR-GluCTC-30                                                              | MST           | rCrCrU rGrGrU rGrGrU rCrUrA rGrUrG rGrUrU rArGrG rArUrU rCrGrG rCrGrC /3AlexF647N/                                                                | IDT     |
| miR-223-3p                                                                 | MST           | rUrGrU rCrArG rUrUrU rGrUrCrArArA rUrArC rCrCrC rA/3AlexF647N/                                                                                    | IDT     |
| miR-375-3p                                                                 | MST           | rUrUrU rGrUrU rCrGrU rUrCrG rGrCrU rCrGrC rGrUrG rA /3AlexF647/                                                                                   | IDT     |
| AS-Scr                                                                     | MST           | ACG TCT ATA CGC CCA                                                                                                                               | Exiqon  |
| AS-GlyGCC                                                                  | MST           | CAC TGA ACC ACC AAT                                                                                                                               | Exiqon  |
| tDR-GlyGCC-AF546                                                           | EMSA          | rGrCrA rUrUrG rGrUrG rGrUrU rCrArG rUrGrG rUrArG rArArU rUrCrU rCrGrC /3AlexF546N/                                                                | IDT     |
| tDR-GlyGCC                                                                 | real-time PCR | TTC TAC CAC TGA ACC ACC AAT GC                                                                                                                    | Qiagen  |
| ssRNA standard                                                             | SYTO          | rArGrA rGrArA rCrUrC rGrGrG rUrGrA rArGrG rArArC rU                                                                                               | IDT     |

Notes: \* =LNA (locked-nucleic acid) base; r=RNA nucleotide; m=2-O-methylated nucleotide; 3AlexF647N=3' terminal fluorophore; tRF=tRNA fragment; AS=antisense;
